# Supplementary material for: Use of CdTe quantum dots for high temperature thermal sensing
Source: Royal Society of Chemistry journal article supplement (doi:10.1039/c4ra03002h), 2014-01-01
Supplement: c4ra03002h1.pdf [file c4ra03002h1.pdf]

## Supporting information for

### Use of CdTe Quantum Dots for High Temperature Thermal Sensing

Yangyang Li<sup>a</sup> and Ben Q Li <sup>\*b</sup>

<sup>a</sup>State Key Laboratory for Manufacturing Systems Engineering, Xi'an Jiaotong University, 710049 Xi'an, China.  
E-mail: liyang617730@stu.xjtu.edu.cn

<sup>b</sup>Department of Mechanical Engineering, College of Engineering and Computer Science, University of Michigan-Dearborn, MI 48128, USA. FAX: 1-313-593-3851; Tel: 1-313-593-5241; E-mail: benqli@umich.edu

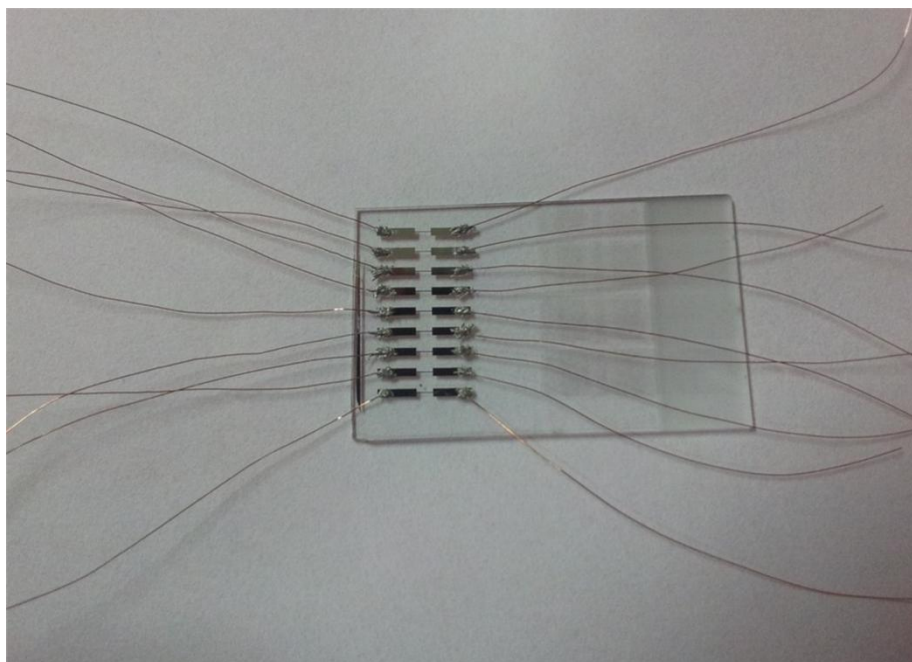

**Fig. S1** Photograph of type A micro-heater electrodes connected with copper wires using electrolong. Same process was done for type B micro-heater.

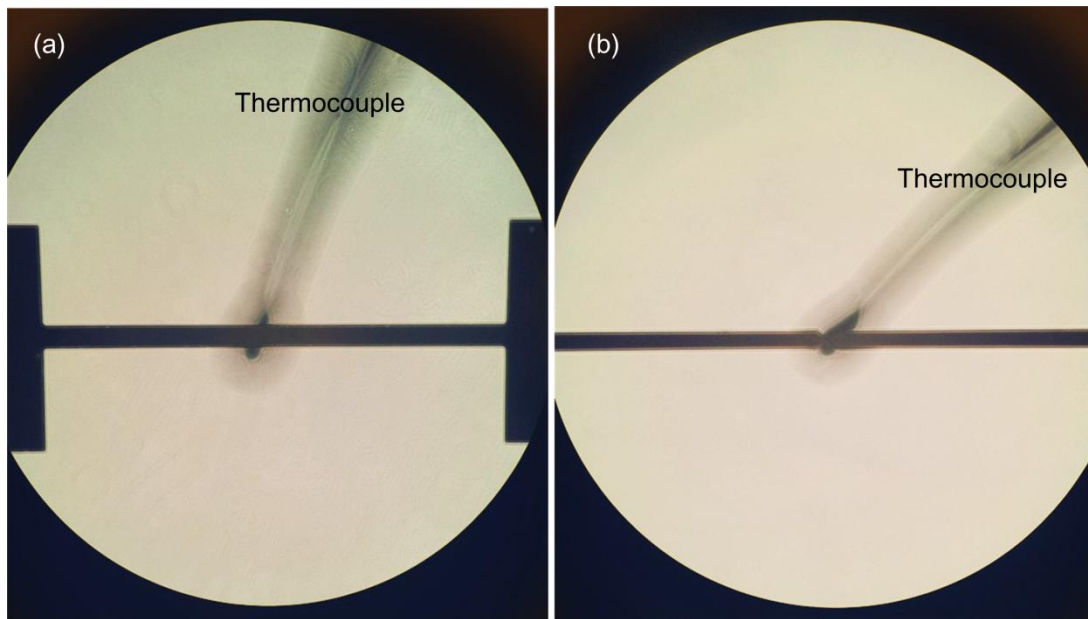

**Fig. S2** Photograph of thermocouple location for type A micro-heater temperature calibration (a) and type B micro-heater thermometry validation (b) in microscopic field.
